# Supplementary material for: Unexplained repeated pregnancy loss is associated with altered perceptual and brain responses to men’s body-odor
Source: eLife. 2020 Sep 29;9:e55305. doi: 10.7554/eLife.55305 (PMC7524551; doi:10.7554/eLife.55305)
Supplement: Figure 1—source data 1. [file elife-55305-fig1-data1.xlsx]

## Sheet: Fig.1b
RPL group	Spouse IDT	#Success/#Trials	Age at test	#Children	matched control	CTRL group	Spouse IDT	#Success/#Trials	Age at test	#Children
RPL01	0	0/4	22	0		CTRL06	50	2/4	28	1
RPL02	50	2/4	27	0		CTRL12	50	5/6	31	1
RPL03	100	6/6	28	4		CTRL11	0	1/4	31	2
RPL04	0	0/6	30	1		CTRL14	0	0/4	33	2
RPL05	25	1/4	28	0		CTRL10	25	2/4	31	2
RPL07	100	6/6	30	0		CTRL19	50	0/6	33	1
RPL08	0	0/2	29	0		CTRL18	0	0/6	32	1
RPL09	100	4/4	29	1		CTRL07	83.3333	0/6	32	2
RPL10	0	0/4	29	2		CTRL17	25	1/4	32	2
RPL11	100	4/4	30	0		CTRL22	25	0/4	33	1
RPL12	83.3333	5/6	31	1		CTRL21	0	1/2	33	2
RPL13	50	3/6	32	0		CTRL23	0	1/4	33	2
RPL14	0	0/4	31	0		CTRL15	0	0/4	33	2
RPL15	50	2/4	31	0		CTRL20	25	1/4	33	2
RPL16	100	6/6	33	2		CTRL26	100	0/4	34	1
RPL18	50	2/4	32	0		CTRL16	0	4/4	33	3
RPL19	100	6/6	35	2		CTRL27	16.6667	1/6	36	2
RPL20	100	6/6	36	1		CTRL28	100	6/6	36	2
RPL21	66.6667	4/6	36	3		CTRL37	0	0/6	37	2
RPL22	100	2/2	35	0		CTRL34	50	5/5*	35	2
RPL23	50	2/4	35	1		CTRL33	100	2/4	36	1
RPL24	33.3333	2/6	36	3		CTRL30	0	0/6	36	2
RPL26	0	0/6	36	3		CTRL40	0	2/6	37	3
RPL28	50	3/6	38	2		CTRL38	33.3333	0/6	38	4
RPL29	100	2/2	38	1		CTRL39	0	0/6	38	3
RPL30	100	6/6	40	3		CTRL44	0	0/6	39	3
RPL31	50	2/4	39	5		CTRL41	0	1/6	39	2
RPL32	100	6/6	41	1		CTRL43	16.6667	0/6	40	4
RPL33	0	0/4	41	1		CTRL45	25	1/4	39	3
RPL35	100	6/6	44	2		CTRL49	25	2/2	41	2
RPL37	100	6/6	45.5	3		CTRL48	100	1/4	41	3
RPL39	0	0/6	49	2		CTRL52	16.6667	0/2	47	2
RPL40	16.6667	1/6	49	1		CTRL51	0	1/6	43	2
AVG	56.8182					AVG included	27.7778
STD	41.2192					STD	34.0844
N	33					N	33
						AVG All Subj	29.18
*The participant did 6 trials, from technical reasons we have the answers of only 5 of them
