# Supplementary material for: Unexplained repeated pregnancy loss is associated with altered perceptual and brain responses to men’s body-odor
Source: eLife. 2020 Sep 29;9:e55305. doi: 10.7554/eLife.55305 (PMC7524551; doi:10.7554/eLife.55305)
Supplement: Figure 2—source data 1. [file elife-55305-fig2-data1.xlsx]

## Sheet: Fig.2a
RPL group	Age at test	#Children	Identification UPSIT(20)	matched control-	CTRL group	Age at test	#Children	Identification UPSIT(20)
RPL01	26	2	100		CTRL01	27	0	90
RPL02	27	0	90		CTRL02	27	0	90
RPL03	28	3	90		CTRL03	27	0	85
RPL04	30	1	95		CTRL09	31	1	70
RPL05	28	0	90		CTRL04	28	0	80
RPL06	30	1	90		CTRL12	31	1	95
RPL07	29	0	100		CTRL05	29	0	85
RPL08	29	0	95		CTRL13	31	1	70
RPL09	29	1	85		CTRL10	31	2	80
RPL10	29	2	80		CTRL11	31	2	75
RPL11	30	0	75		CTRL07	32	2	85
RPL12	31	1	90		CTRL17	32	2	80
RPL13	31	0	95		CTRL18	32	1	80
RPL14	31	0	75		CTRL14	32	2	90
RPL15	31	0	95		CTRL08	32	2	95
RPL16	32	2	90		CTRL21	33	2	80
RPL17	32	3	90		CTRL56	33	3	90
RPL18	32	0	95		CTRL16	33	3	90
RPL19	35	2	85		CTRL34	35	2	80
RPL20	35	1	85		CTRL32	35	1	95
RPL21	35	3	95		CTRL27	35	2	80
RPL22	35	0	80		CTRL28	35	2	85
RPL23	35	1	90		CTRL29	35	2	85
RPL24	36	3	90		CTRL24	35	2	85
RPL25	36	2	75		CTRL31	35	2	85
RPL26	36	3	80		CTRL36	36	1	95
RPL27	37	2	95		CTRL38	37	4	90
RPL28	37	2	90		CTRL41	38	2	95
RPL29	38	1	75		CTRL46	39	N/A	90
RPL30	39	3	90		CTRL45	39	3	80
RPL31	39	5	80		CTRL43	39	4	90
RPL32	40	1	85		CTRL44	39	2	75
RPL33	41	1	90		CTRL42	40	4	70
RPL35	44	2	95		CTRL49	41	2	80
RPL36	45	1	80		CTRL47	41	2	95
RPL37	45	3	85		CTRL48	41	3	80
RPL38	46	0	75		CTRL50	43	2	90
RPL39	48	2	90		CTRL52	47	2	80
AVG			87.6316		AVG included			84.6053
STD			7.23513		STD			7.29509
N			38		N			38
					AVG All Subj			84.6296

## Sheet: Fig.2b
RPL group	Age at test	#Children	EST	ANN	AND	matched control-	CTRL group	Age at test	#Children	EST	ANN	AND
RPL01	26	2	16.6667	100			CTRL01	27	0	20	20	30
RPL02	27	0	33.3333	100	66.6667		CTRL02	27	0	40	90	50
RPL03	28	3	30	40	60		CTRL04	28	0	0	66.6667
RPL04	30	1	50	100	100		CTRL12	31	1	33.3333	100	100
RPL05	28	0	0	33.3333	66.6667		CTRL03	27	0	20	20	80
RPL06	30	1	33.3333	33.3333			CTRL13	31	1	100	66.6667	100
RPL07	29	0	16.6667	66.6667	30		CTRL10	31	2	33.3333	66.6667	100
RPL08	29	0	100	100	0		CTRL06	28	1	66.6667	33.3333	33.3333
RPL09	29	1	100	66.6667	66.6667		CTRL05	29	0	30	20	40
RPL10	29	2	66.6667	66.6667	100		CTRL09	31	1	10	20	30
RPL11	30	0	66.6667	100	100		CTRL11	31	2	100	100	100
RPL12	31	1	40	100	100		CTRL08	32	2	40	30	60
RPL13	31	0	33.3333	33.3333	40		CTRL17	32	2	33.3333	66.6667	100
RPL14	31	0	33.3333	100	66.6667		CTRL07	32	2	20	50	30
RPL15	31	0	66.6667	66.6667	66.6667		CTRL14	32	2	50	66.6667	40
RPL16	32	2	83.3333	66.6667	80		CTRL16	33	3	40	10	70
RPL17	32	3	100	100			CTRL21	33	2	0	0	0
RPL18	32	0	100	66.6667	100		CTRL18	32	1	33.3333	0	100
RPL19	35	2	16.6667	66.6667	20		CTRL28	35	2	30	40	0
RPL20	35	1	20	40	60		CTRL29	35	2	70	90	90
RPL21	35	3	60	30	30		CTRL24	35	2	83.3333	100	90
RPL22	35	0	100	100	100		CTRL32	35	1	40	40	20
RPL23	35	1	66.6667	100	100		CTRL27	35	2	10	90	100
RPL24	36	3	40	60	70		CTRL31	35	2	33.3333	100
RPL25	36	2	50	33.3333	20		CTRL34	35	2	0	100	66.6667
RPL26	36	3	16.6667	66.6667	20		CTRL36	36	1	10	50	10
RPL28	37	2	50	33.3333	30		CTRL38	37	4	40	100	40
RPL29	38	1	0	100	100		CTRL41	38	2	10	40	70
RPL30	39	3	40	40	50		CTRL44	39	3	20	90	40
RPL31	39	5	100	100	66.6667		CTRL45	39	3	33.33	100	100
RPL32	40	1	20	40	10		CTRL46	39	N/A	0	33.3333	0
RPL33	41	1	66.6667	100	100		CTRL42	40	4	40	100	100
RPL35	44	2	30	50	20		CTRL47	41	2	60	30	30
RPL36	45	1	20	100	100		CTRL48	41	3	0	100	0
RPL37	45	3	10	70	20		CTRL49	41	2	33.3333	66.6667	33.3333
RPL38	46	0	40	90	30		CTRL50	43	2	30	100	100
RPL39	48	2	40	100	90		CTRL51	43	2	100	100	0
RPL40	49	1	70	40	60		CTRL52	47	2	33.3333	33.3333	30
AVG			48.0702	71.0526	61.1429		AVG included			35.4385	61.3158	55.0926
STD			30.3199	27.1477	32.4585		STD			27.4373	34.0247	36.7617
N			38	38	35		N			38	38	36
							AVG All Subj			35.96	60.35	52.53

## Sheet: Fig.2c
RPL group	Detection threshold	Age at test	#Children		CTRL group	Detection threshold	Age at test	#Children
RPL03	5.59	24	1		CTRL10	6.19	31	2
RPL02	4.67	27	0		CTRL11	4.93	31	2
RPL05	4.66	28	0		CTRL12	5.79	31	1
RPL16	5.1	28	0		CTRL17	5.39	32	2
RPL08	5.1	29	0		CTRL18	4.4	32	1
RPL09	4.97	29	1		CTRL19	6.28	33	1
RPL10	4.38	29	2		CTRL20	4.51	33	2
RPL11	4.46	30	0		CTRL21	5	33	2
RPL14	5.59	31	0		CTRL22	4.08	33	1
RPL15	5.02	31	0		CTRL23	4.39	33	2
RPL18	4.9	32	0		CTRL25	4.44	34	2
RPL22	4.77	35	0		CTRL34	5.99	35	2
RPL31	4.99	39	5		CTRL40	4.9	37	3
RPL35	5.61	40	2		CTRL45	4.78	39	3
RPL33	5.07	41	1		CTRL46	4.84	39	N/A
RPL37	4.42	42	2		CTRL06	4.26	41	2
RPL38	4.73	42	0		CTRL49	4.85	41	2
RPL40	5.65	44	1		CTRL51	6.14	41	3
AVG	4.98222				AVG included	5.06444
STD	0.41189				STD	0.720573
N	18				N	18
					AVG All Subj	5.06

## Sheet: Fig.2d
RPL group	Age at UPSIT test	#Children at UPSIT	Composite olfactory score		CTRL group	Age at UPSIT test	#Children at UPSIT	Composite olfactory score		Tests performed
RPL01	25.5	2	79.1667		CTRL04	28	0	33.3333		UPSIT, EST, ANN
RPL02	27	0	66.6667		CTRL02	27	0	63.3333		UPSIT, EST, ANN, AND*
RPL03	28	3	59.5455		CTRL10	31	2	65.303		UPSIT, EST, ANN, AND, TH
RPL04	30	1	83.3333		CTRL03	27	0	45		UPSIT, EST, ANN, AND
RPL05	28	0	42.1212		CTRL11	31	2	51.7677		UPSIT, EST, ANN, AND, TH
RPL06	30	1	50		CTRL31	35	2	58.3333		UPSIT, EST, ANN
RPL07	29	0	68.8889		CTRL05	28.5	0	40		UPSIT, EST, ANN, AND
RPL08	29	0	65.4545		CTRL12	31	1	79.6128		UPSIT, EST, ANN, AND, TH
RPL09	29	1	56.0774		CTRL17	32	2	53.1818		UPSIT, EST, ANN, AND, TH
RPL10	29	2	41.5825		CTRL18	32	1	30.7744		UPSIT, EST, ANN, AND, TH
RPL11	30	0	40.9428		CTRL20	33	2	41.7003		UPSIT, EST, ANN, AND, TH
RPL12	31	1	73.3333		CTRL16	33	3	53.3333		UPSIT, EST, ANN, AND
RPL13	31	0	59.4444		CTRL14	32	2	59.4444		UPSIT, EST, ANN, AND
RPL14	31	0	50.6566		CTRL21	33	2	25.0505		UPSIT, EST, ANN, AND, TH
RPL15	31	0	64.2424		CTRL22	33	1	48.1481		UPSIT, EST, ANN, AND, TH
RPL16	32	2	63.2323		CTRL23	33	2	23.2155		UPSIT, EST, ANN, AND, TH
RPL17	32	3	83.3333		CTRL35	36.5	2	41.6667		UPSIT, EST, ANN
RPL18	32	0	69.8316		CTRL25	34	2	18.4175		UPSIT, EST, ANN, AND, TH
RPL19	35	2	42.2222		CTRL27	35	2	50		UPSIT, EST, ANN, AND
RPL20	35	1	45		CTRL33	35	1	50		UPSIT, EST, ANN, AND
RPL21	35	3	61.6667		CTRL32	35	1	58.3333		UPSIT, EST, ANN, AND
RPL22	35	0	54.899		CTRL34	35	2	58.569		UPSIT, EST, ANN, AND, TH
RPL23	35	1	77.7778		CTRL28	35	2	36.6667		UPSIT, EST, ANN, AND
RPL24	35.5	3	61.6667		CTRL29	35	2	66.6667		UPSIT, EST, ANN, AND
RPL25	36	2	25.5556		CTRL37	36.5	2	45		UPSIT, EST, ANN, AND
RPL26	35.5	3	33.8889		CTRL30	35.5	2	76.6667		UPSIT, EST, ANN, AND
RPL27	37	2	83.3333		CTRL39	37	3	50		UPSIT**
RPL28	37	2	52.2222		CTRL38	37	4	63.3333		UPSIT, EST, ANN, AND
RPL29	38	1	41.6667		CTRL41	38	2	61.6667		UPSIT, EST, ANN, AND
RPL30	39	3	55		CTRL43	39	4	75		UPSIT, EST, ANN, AND
RPL31	39	5	54.5286		CTRL40	37	3	29.0909		UPSIT, EST, ANN, AND, TH
RPL32	40	1	36.6667		CTRL44	39	2	33.3333		UPSIT, EST, ANN, AND
RPL33	41	1	66.8519		CTRL45	39	3	47.6427		UPSIT, EST, ANN, AND, TH
RPL35	43.5	2	62.0707		CTRL46	39	N/A	37.4411		UPSIT, EST, ANN, AND, TH
RPL36	45	1	53.3333		CTRL50	43	2	71.6667		UPSIT, EST, ANN, AND
RPL37	45	3	32.9293		CTRL48	41	3	35.8586		UPSIT, EST, ANN, AND, TH
RPL38	46	0	33.1818		CTRL49	41	2	37.5926		UPSIT, EST, ANN, AND, TH
RPL39	48	2	71.6667		CTRL52	47	3	32.7778		UPSIT, EST, ANN, AND
RPL40	49	1	64.0152		CTRL51	43	2	80.1515		EST, ANN, AND, TH
AVG			57.1281		AVG included			49.4634
STD			15.2291		STD			16.1351
N			39		N			39
					AVG All Subj			49.89
*RPL02 performed all test. In order to level her matched control- her composite score was calculated without TH
**RPL27 had only UPSIT. In order to level her matched control- her matched control's composite score was calculated with UPSIT only
