# Supplementary material for: Unexplained repeated pregnancy loss is associated with altered perceptual and brain responses to men’s body-odor
Source: eLife. 2020 Sep 29;9:e55305. doi: 10.7554/eLife.55305 (PMC7524551; doi:10.7554/eLife.55305)
Supplement: Figure 3—source data 1. [file elife-55305-fig3-data1.xlsx]

## Sheet: Fig.3a
RPL group	Blank	Non-spouse	Spouse		CTRL group	Blank	Non-spouse	Spouse
RPL03	0.483514	0.427588	0.849332		CTRL07	0.114775	0.601732	0.859975
RPL04	0.607888	0.807596	0.435935		CTRL14	0.282346	0.390547	0.582012
RPL07	0.0753339	0.316256	0.782972		CTRL15	0.253756	0.619261	0.245409
RPL12	0.608723	0.49687	0.584516		CTRL16	0.172788	0.371661	0.110601
RPL13	0.479341	0.330655	0.692613		CTRL24	0.429257	0.527337	0.659015
RPL16	0.151085	0.14712	0.630426		CTRL27	0.434891	0.347454	0.413397
RPL19	0.131678	0.166215	0.326169		CTRL28	0.354341	0.413084	0.512521
RPL20	0.347663	0.715463	0.584933		CTRL30	0.767738	0.781824	0.276085
RPL21	0.368114	0.357784	0.210142		CTRL33	0.357053	0.520555	0.34975
RPL24	0.540693	0.264608	0.269825		CTRL37	0.357888	0.542988	0.339733
RPL26	0.791528	0.329194	0.263982		CTRL38	0.378965	0.458785	0.572412
RPL28	0.301753	0.280259	0.0191987		CTRL39	0.293823	0.270868	0.116653
RPL30	0.181135	0.213794	0.41298		CTRL41	0.450751	0.569178	0.252087
RPL32	0.149207	0.371035	0.628339		CTRL43	0.135225	0.362792	0.176544
RPL35	0.458681	0.498748	0.683639		CTRL44	0.578464	0.486331	0.338689
RPL37	0.285476	0.32523	0.415902		CTRL52	0.320952	0.586916	0.0525876
RPL39	0.343489	0.274833	0.209307		CTRL53	0.605175	0.247705	0.414441
RPL40	0.138564	0.189482	0.326795		CTRL55	0.721202	0.664545	0.412563
AVG	0.357992	0.361818	0.462611		AVG	0.389411	0.486865	0.37136
STD	0.20191	0.176616	0.227899		STD	0.184225	0.14131	0.209436
