# Supplementary material for: Unexplained repeated pregnancy loss is associated with altered perceptual and brain responses to men’s body-odor
Source: eLife. 2020 Sep 29;9:e55305. doi: 10.7554/eLife.55305 (PMC7524551; doi:10.7554/eLife.55305)
Supplement: Figure 4—source data 1. [file elife-55305-fig4-data1.xlsx]

## Sheet: Fig.4a
RPL group	Right OB	Left OB	Avg OB	Age at test	#Children	Age of children	matched control-	CTRL group	Right OB	Left OB	Avg OB	Age at test	#Children	Age of children
RPL01	47.014	45.2405	46.1273	25	2	1.8, 0.3		CTRL53	63.2255	57.6851	60.4553	33	2	2.5,0.4
RPL03	55.5936	57.0246	56.3091	27	2	5,0.6		CTRL14	50.8421	44.7391	47.7906	32	2	3.7, 1.4
RPL04	43.6812	50.9828	47.332	28	0			CTRL02	75.3764	72.8814	74.1289	27	0
RPL06	40.5685	38.8501	39.7093	29	1	0.7		CTRL33	50.6036	51.1723	50.888	35	1	0.9
RPL07	41.2351	41.8099	41.5225	29	0			CTRL03	63.8492	61.8434	62.8463	27	0
RPL12	44.0909	38.0674	41.0791	29	0			CTRL04	44.4211	54.2177	49.3194	28.5	0
RPL13	37.3825	36.8076	37.095	31	0			CTRL05	63.8859	62.7179	63.3019	28.9	0
RPL16	52.9152	53.0681	52.9916	32	2	2.6, 0.6		CTRL08	59.1099	46.7755	52.9427	31	2	3.5, 1.5
RPL17	67.3227	67.7079	67.5153	32	3	5,5,4		CTRL44	53.4105	52.9213	53.1659	39	3	5,5,3
RPL19	47.8884	55.5447	51.7166	34	2	6.5, 2		CTRL37	44.9592	52.5911	48.7752	36	2	6,2
RPL20	42.6844	40.6663	41.6754	35	1	4		CTRL32	63.0481	49.6802	56.3642	35	1	3
RPL24	65.2924	50.414	57.8532	35	3	6,2.5,0.5		CTRL38	57.2264	57.4527	57.3395	37	4	9,6,1,1
RPL25	25.6412	34.8079	30.2246	35	2	7.8, 2.8		CTRL29	43.7729	51.1112	47.442	35	2	5,3
RPL26	30.2827	33.7561	32.0194	35	3	5.5, 2,2		CTRL16	52.5116	58.052	55.2818	32	2	4,2
RPL27	47.9496	49.5946	48.7721	37	2	1.5, 3.3		CTRL35	50.1755	51.9123	51.0439	36	2	1.7,3
RPL28	62.9503	56.1318	59.541	37	2	4,9		CTRL31	44.152	39.425	41.7885	35	2	6.5, 3.5
RPL30	42.8801	45.8031	44.3416	39	3	8,5,2		CTRL43	65.3658	61.4582	63.412	39	4	9.5,7,3.5,1
RPL32	41.5164	37.4375	39.4769	40	1	8.5		CTRL30	55.2879	62.7668	59.0274	35.5	2	8,4
RPL34	43.1858	51.3374	47.2616	41	5	23,19,14,5,4		CTRL41	58.902	60.0761	59.4891	38	2	5,3
RPL35	46.5064	45.1672	45.8368	43	2	14,11		CTRL52	52.322	49.6557	50.9889	47	2	16,12
RPL36	68.3928	56.4804	62.4366	45	1	5.9		CTRL54	37.5415	43.0574	40.2994	39	1	5.5
RPL37	32.7104	34.9425	33.8265	45	3	13,10,0.8		CTRL39	49.5824	57.5016	53.542	37	3	7.5,6,0.7
RPL40	26.9376	45.5035	36.2206	48	1	10		CTRL28	73.5602	81.1615	77.3608	35	2	10,3
AVG	45.8531	46.3977	46.1254					AVG	55.3536	55.6894	55.5215
STD	11.9646	8.90679	9.9334					STD	9.67072	9.34509	8.95341
N	23	23	23					N	23	23	23
								AVG ALL	53.7028	53.2644	53.4836

## Sheet: Fig.4c
RPL group	Right OS	Left OS	Avg OS	Age at test	#Children	Age of children	matched control-	CTRL group	Right OS	Left OS	Avg OS	Age at test	#Children	Age of children
RPL01	5.9055	6.124	6.01475	25	2	1.8, 0.3		CTRL53	5	6.7055	5.85275	33	2	2.5,0.4
RPL03	6.5395	7.542	7.04075	27	2	5,0.6		CTRL14	7.519	8.96	8.2395	32	2	3.7, 1.4
RPL04	5.95	4.915	5.4325	28	0			CTRL02	7.467	7.0375	7.25225	27	0
RPL06	5.65	3.83	4.74	29	1	0.7		CTRL33	7.005	8.5395	7.77225	35	1	0.9
RPL07	6.5	7.955	7.2275	29	0			CTRL03	7.1265	7.687	7.40675	27	0
RPL12	8.445	8.22	8.3325	29	0			CTRL04	6.9875	6.6805	6.834	28.5	0
RPL13	6.21525	6.3645	6.28988	31	0			CTRL05	5.895	4.895	5.395	28.9	0
RPL16	6.4885	5.1805	5.8345	32	2	2.6, 0.6		CTRL08	6.567	6.644	6.6055	31	2	3.5, 1.5
RPL17	6.525	6.605	6.565	32	3	5,5,4		CTRL44	9.35	7.7	8.525	39	3	5,5,3
RPL19	7.025	7.15	7.0875	34	2	6.5, 2		CTRL37	5.04	5.31	5.175	36	2	6,2
RPL20	7.1555	6.8775	7.0165	35	1	4		CTRL32	6.824	6.5435	6.68375	35	1	3
RPL24	7.4595	5.3835	6.4215	35	3	6,2.5,0.5		CTRL38	8.35	8.167	8.2585	37	4	9,6,1,1
RPL25	7.44	7.33	7.385	35	2	7.8, 2.8		CTRL29	8.4445	6.6055	7.525	35	2	5,3
RPL26	7.58	7.75	7.665	35	3	5.5, 2,2		CTRL16	5.175	4.575	4.875	32	2	4,2
RPL27	8.22	7.905	8.0625	37	2	1.5, 3.3		CTRL35	7.082	6.4235	6.75275	36	2	1.7,3
RPL28	6.0175	4.538	5.27775	37	2	4,9		CTRL31	6.25	8.3	7.275	35	2	6.5, 3.5
RPL30	6.3335	6.882	6.60775	39	3	8,5,2		CTRL43	9.507	8.392	8.9495	39	4	9.5,7,3.5,1
RPL32	4.7235	4.8935	4.8085	40	1	8.5		CTRL30	4.4765	4.0665	4.2715	35.5	2	8,4
RPL34	5.45	4.05	4.75	41	5	23,19,14,5,4		CTRL41	5.725	6.658	6.1915	38	2	5,3
RPL35	5.1895	4.7315	4.9605	43	2	14,11		CTRL52	8.145	7.555	7.85	47	2	16,12
RPL36	7.3115	6.1365	6.724	45	1	5.9		CTRL54	7.0535	6.57	6.81175	39	1	5.5
RPL37	5.85	5.01	5.43	45	3	13,10,0.8		CTRL39	7.9645	7.715	7.83975	37	3	7.5,6,0.7
RPL40	3.955	5.2425	4.59875	48	1	10		CTRL28	9.4895	9.5385	9.514	35	2	10,3
AVG	6.43171	6.11374	6.27272					AVG	7.06276	7.01167	7.03722
STD	1.07801	1.34772	1.1234					STD	1.442	1.39009	1.32039
N	23	23	23					N	23	23	23
								AVG ALL	7.16413	6.75738	6.96076

## Sheet: Fig.4e
RPL group	Avg OB	Composite olfactory score		CTRL group	Avg OB	Composite olfactory score
RPL01	46.1273	79.1667		CTRL02	74.1289	63.3333
RPL03	56.3091	59.5455		CTRL03	62.8463	45
RPL04	47.332	83.3333		CTRL04	49.3194	33.3333
RPL06	39.7093	50		CTRL05	63.3019	40
RPL07	41.5225	68.8889		CTRL08	52.9427	63.3333
RPL12	41.0791	73.3333		CTRL14	47.7906	59.4444
RPL13	37.095	59.4444		CTRL16	55.2818	53.3333
RPL16	52.9916	63.2323		CTRL28	77.3608	36.6667
RPL17	67.5153	83.3333		CTRL29	47.442	66.6667
RPL19	51.7166	42.2222		CTRL30	59.0274	76.6667
RPL20	41.6754	45		CTRL31	41.7885	58.3333
RPL24	57.8532	61.6667		CTRL32	56.3642	58.3333
RPL25	30.2246	25.5556		CTRL33	50.888	50
RPL26	32.0194	33.8889		CTRL35	51.0439	41.6667
RPL27	48.7721	83.3333		CTRL37	48.7752	45
RPL28	59.541	52.2222		CTRL38	57.3395	63.3333
RPL30	44.3416	55		CTRL39	53.542	50
RPL32	39.4769	36.6667		CTRL41	59.4891	61.6667
RPL35	45.8368	62.0707		CTRL43	63.412	75
RPL36	62.4366	53.3333		CTRL44	53.1659	33.3333
RPL37	33.8265	32.9293		CTRL52	50.9889	32.7778
RPL40	36.2206	64.0152		CTRL53	60.4553	26.6667
				CTRL54	40.2994	68.3333
AVG	46.0737	57.6446		AVG	55.5215	52.2705
STD	10.164	17.0239		STD	8.95341	14.3557
N	22	22		N	23	23
