# Supplementary material for: Unexplained repeated pregnancy loss is associated with altered perceptual and brain responses to men’s body-odor
Source: eLife. 2020 Sep 29;9:e55305. doi: 10.7554/eLife.55305 (PMC7524551; doi:10.7554/eLife.55305)
Supplement: Figure 5—source data 1. [file elife-55305-fig5-data1.xlsx]

## Sheet: Fig.5a
RPL group	Blank	Body odor		CTRL group	Blank	Body odor
RPL01	-0.1268	0.142		CTRL04	0.4914	-0.2159
RPL03	-0.01056	0.1157		CTRL07	0.4499	-0.2557
RPL04	0.2157	0.08264		CTRL09	0.2675	-0.05373
RPL06	-0.1281	-0.4179		CTRL14	0.4365	0.01289
RPL07	0.03125	0.009283		CTRL15	0.4459	-0.1648
RPL12	0.07898	0.1813		CTRL16	0.09194	0.2327
RPL13	-0.007212	0.1089		CTRL24	0.289	0.2342
RPL16	0.2623	0.1568		CTRL29	-0.2451	0.02767
RPL17	-0.1402	0.1671		CTRL31	0.01569	0.2378
RPL19	0.1393	-0.1258		CTRL32	0.1075	0.1422
RPL21	0.006607	0.03247		CTRL35	-0.024	0.1992
RPL24	-0.09556	0.02194		CTRL39	0.2751	-0.06399
RPL25	0.2801	0.1961		CTRL42	-0.05478	0.1615
RPL26	0.06738	0.535		CTRL43	0.5974	0.5294
RPL27	0.0979	0.3797		CTRL44	0.4383	0.159
RPL28	0.6217	0.722		CTRL47	-0.01699	-0.07392
RPL30	-0.1857	0.4796		CTRL50	0.2982	0.2511
RPL32	-0.06021	0.4964		CTRL52	0.1773	-0.02604
RPL35	0.07752	0.176		CTRL53	-0.1547	-0.05439
RPL36	0.09534	0.1207		CTRL54	0.01771	-0.2931
RPL38	-0.4935	-0.02457		CTRL55	0.1506	0.0403
RPL39	-0.4122	-0.2376		CTRL56	0.0405	-0.1343
RPL40	-0.07298	0.2891		CTRL57	0.09549	-0.02922

## Sheet: Fig.5b
RPL group	Blank	Body odor		CTRL group	Blank	Body odor
RPL01	0.5022	-0.02369		CTRL04	-0.1094	0.122
RPL03	0.02678	-0.06009		CTRL07	-0.09004	0.1904
RPL04	-0.05827	-0.01441		CTRL09	-0.1898	0.05532
RPL06	0.2703	-0.2589		CTRL14	-0.4901	-0.0186
RPL07	-0.03651	-0.03715		CTRL15	-0.143	0.7469
RPL12	0.1264	0.0583		CTRL16	-0.1027	0.1219
RPL13	-0.1168	-0.08465		CTRL24	0.03141	-0.2399
RPL16	0.1429	-0.2912		CTRL29	0.006437	0.106
RPL17	0.05927	-0.04046		CTRL31	0.009236	0.5367
RPL19	0.08508	-0.01087		CTRL32	0.02905	0.1589
RPL21	0.08583	-0.07368		CTRL35	0.06499	-0.1976
RPL24	0.08395	-0.05441		CTRL39	-0.07164	-0.1292
RPL25	0.03251	0.01579		CTRL42	0.005512	0.09214
RPL26	-0.1446	-0.1169		CTRL43	-0.04077	0.1421
RPL27	0.2343	-0.08367		CTRL44	0.1722	0.1082
RPL28	0.007513	-0.09741		CTRL47	-0.1482	-0.1138
RPL30	0.1831	0.0473		CTRL50	0.2075	0.1486
RPL32	0.2211	-0.1676		CTRL52	-0.08407	-0.1089
RPL35	0.1598	0.06124		CTRL53	-0.1392	-0.09659
RPL36	0.02883	-0.1224		CTRL54	0.09719	0.4117
RPL38	0.2126	0.09683		CTRL55	0.05736	0.02407
RPL39	-0.04269	-0.05486		CTRL56	0.03498	0.1186
RPL40	0.1483	-0.3129		CTRL57	0.01322	-0.01855
