# Supplementary material for: Unexplained repeated pregnancy loss is associated with altered perceptual and brain responses to men’s body-odor
Source: eLife. 2020 Sep 29;9:e55305. doi: 10.7554/eLife.55305 (PMC7524551; doi:10.7554/eLife.55305)
Supplement: Supplementary file 1. — A table of all uRPL and Control women who participated in the project, including their age, number of pregnancies, number of repeated pregnancy losses (if any) and number of living children. [file elife-55305-supp1.xlsx]

## Sheet: SuppTable1-Participants
RPL group codes	Age	Pregnancies#	RPL#	Children#	Control group codes	Age	Pregnancies#	RPL#	Children#
RPL01	26	2-5	2-3	0-2	CTRL01	26	0	0	0
RPL02	27	4-9	4-8	0-1	CTRL02	27	0	0	0
RPL03	28	4-6	3	1-4**	CTRL03	27	0	0	0
RPL04	28	6-7	5	0-1	CTRL04	28	0	0	0
RPL05	28	2	2	0	CTRL05	28	0	0	0
RPL06	29	4	3	1	CTRL06	28	1-2	0	1-2
RPL07	29	7	7	0	CTRL07	31	2	0	2
RPL08	29	5	4	0	CTRL08	31	2	0	2
RPL09	29	6	4	1	CTRL09	31	1	0	1
RPL10	29	6	3	2	CTRL10	31	2	0	2
RPL11	30	3	3	0	CTRL11	31	2	0	2
RPL12	31	2-4	2-3	0-1	CTRL12	31	1	0	1
RPL13	31	3-5	3-5	0	CTRL13	31	1-2	0	1-2
RPL14	31	3	3	0	CTRL14	32	2	0	2
RPL15	31	3	3	0	CTRL15	32	2	0	2
RPL16	32	4-6	3*	0-2	CTRL16	32	2-3	0	2-3
RPL17	32	4	2	3**	CTRL17	32	2	0	2
RPL18	32	5	5	0	CTRL18	32	1	0	1
RPL19	35	7	5	2	CTRL19	33	1-2	0	1-2
RPL20	35	3	2	1	CTRL20	33	2	0	2
RPL21	35	12	9	3	CTRL21	33	2-3	0	2-3
RPL22	35	3-5	3-4	0-1	CTRL22	33	1	0	1
RPL23	35	4	3	1	CTRL23	33	2	0	2
RPL24	36	6	3	3	CTRL24	34	2	0	2
RPL25	36	6	4	2	CTRL25	34	2	0	2
RPL26	36	5	3	3**	CTRL26	34	1	0	1
RPL27	37	6-7	4-5	2	CTRL27	35	2	0	2
RPL28	37	8-9	6-7	2	CTRL28	35	2	0	2
RPL29	38	5	4	1	CTRL29	35	2	0	2
RPL30	39	6	3	3	CTRL30	35	2	0	2
RPL31	39	11	6	5	CTRL31	35	2	0	2
RPL32	40	11	10	1	CTRL32	35	1	0	1
RPL33	41	5	4	1	CTRL33	35	1	0	1
RPL34	42	7	2	5	CTRL34	35	2	0	2
RPL35	44	5-6	3-4	2	CTRL35	36	2	0	2
RPL36	45	13	12	1	CTRL36	36	1	0	1
RPL37	45	5-7	3-4	2-3	CTRL37	36	2	0	2
RPL38	46	3-5	3-5	0	CTRL38	37	3	0	4**
RPL39	48	8	6	2	CTRL39	37	3	0	3
RPL40	49	4	2*	1	CTRL40	37	3	0	3
					CTRL41	38	2	0	2
					CTRL42	39	4	0	4
					CTRL43	39	4	0	4
					CTRL44	39	2	0	3**
					CTRL45	39	3	0	3
					CTRL46	39	N/A	0	N/A
					CTRL47	40	2	0	2
					CTRL48	41	3	0	3
					CTRL49	41	2	0	2
					CTRL50	42	2	0	2
					CTRL51	43	2	0	2
					CTRL52	47	2	0	2
					CTRL53	33	2	0	2
					CTRL54	39	1	0	1
					CTRL55	35	1	0	1
					CTRL56	33	3	0	3
					CTRL57	33	1	0	1
*+1 out of uterus or artificial abortion
**has twins
