# Supplementary material for: Unexplained repeated pregnancy loss is associated with altered perceptual and brain responses to men’s body-odor
Source: eLife. 2020 Sep 29;9:e55305. doi: 10.7554/eLife.55305 (PMC7524551; doi:10.7554/eLife.55305)
Supplement: Supplementary file 2. — An extended table for ‘Figure 1—source data 1' containing the success rates at the spouse identification task, with the first two trials, first four trials, and all trials per participant. [file elife-55305-supp2.xlsx]

## Sheet: SuppTable2
RPL group	First 2/2 success trials	Success rate 2/2	First 4/4 success trials**	Success rate 4/4	#Success/ #Trials- All trilas	Spouse IDT score		CTRL group	First 2/2 success trials	Success rate 2/2	First 4/4 success trials**	Success rate 4/4	#Success/ #Trials- All trilas	Spouse IDT score
RPL01	0/2	0	0/4	0	0/4	0		CTRL06	2/2	100	2/4	50	2/4	50
RPL02	0/2	0	2/4	50	2/4	50		CTRL07	1/2	50	3/4	75	5/6	83
RPL03	2/2	100	4/4	100	6/6	100		CTRL10	0/2	0	1/4	25	1/4	25
RPL04	0/2	0	0/4	0	0/6	0		CTRL11	0/2	0	0/4	0	0/4	0
RPL05	0/2	0	1/4	25	1/4	25		CTRL12	0/2	0	2/4	50	2/4	50
RPL07	2/2	100	4/4	100	6/6	100		CTRL14	0/2	0	0/4	0	0/6	0
RPL08	0/2	0	0/2	0	0/2	0		CTRL15	0/2	0	0/4	0	0/6	0
RPL09	2/2	100	4/4	100	4/4	100		CTRL16	0/2	0	0/4	0	0/6	0
RPL10	0/2	0	0/4	0	0/4	0		CTRL17	1/2	50	1/4	25	1/4	25
RPL11	2/2	100	4/4	100	4/4	100		CTRL18	0/2	0	0/4	0	0/4	0
RPL12	2/2	100	3/4	75	5/6	83.3333		CTRL19	1/2	50	1/2	50	1/2	50
RPL13	0/2	0	1/4	25	3/6	50		CTRL20	1/2	50	1/4	25	1/4	25
RPL14	0/2	0	0/4	0	0/4	0		CTRL21	0/2	0	0/4	0	0/4	0
RPL15	1/2	50	2/4	50	2/4	50		CTRL22	0/2	0	1/4	25	1/4	25
RPL16	2/2	100	4/4	100	6/6	100		CTRL23	0/2	0	0/4	0	0/4	0
RPL18	1/2	50	2/4	50	2/4	50		CTRL26	2/2	100	4/4	100	4/4	100
RPL19	2/2	100	4/4	100	6/6	100		CTRL27	0/2	0	0/4	0	1/6	17
RPL20	2/2	100	4/4	100	6/6	100		CTRL28	2/2	100	4/4	100	6/6	100
RPL21	1/2	50	2/4	50	4/6	66.6667		CTRL30	0/2	0	0/4	0	0/6	0
RPL22	2/2	100	2/2	100	2/2	100		CTRL33	2/2	100	4/4	100	5/5*	100
RPL23	0/2	0	2/4	50	2/4	50		CTRL34	0/2	0	2/4	50	2/4	50
RPL24	0/2	0	1/4	25	2/6	33.3333		CTRL37	0/2	0	0/4	0	0/6	0
RPL26	0/2	0	0/4	0	0/6	0		CTRL38	1/2	50	2/4	50	2/6	33
RPL28	2/2	100	3/4	75	3/6	50		CTRL39	0/2	0	0/4	0	0/6	0
RPL29	2/2	100	2/2	100	2/2	100		CTRL40	0/2	0	0/4	0	0/6	0
RPL30	2/2	100	4/4	100	6/6	100		CTRL41	0/2	0	0/4	0	0/6	0
RPL31	1/2	50	2/4	50	2/4	50		CTRL43	0/2	0	0/4	0	1/6	17
RPL32	2/2	100	4/4	100	6/6	100		CTRL44	0/2	0	0/4	0	0/6	0
RPL33	0/2	0	0/4	0	0/4	0		CTRL45	1/2	50	1/4	25	1/4	25
RPL35	2/2	100	4/4	100	6/6	100		CTRL48	2/2	100	2/2	100	2/2	100
RPL37	2/2	100	4/4	100	6/6	100		CTRL49	0/2	0	1/4	25	1/4	25
RPL39	0/2	0	0/4	0	0/6	0		CTRL51	0/2	0	0/2	0	0/2	0
RPL40	0/2	0	0/4	0	1/6	16.6667		CTRL52	1/2	50	1/4	25	1/6	17
					AVG	56.8182							AVG included	27.7879
					STD	41.2192							STD	34.0558
					N	33							N	33
													AVG All Subj	29.18
*The participant did 6 trials, from technical reasons we have the answers of only 5 of them
**3 participants from each group had only 2 trials
